# Supplementary material
Source: PubMed Central journal article supplement (PMC1952211)
Supplement: NIHMS22206-supplement-1.pdf [file NIHMS22206-supplement-1.pdf]

## SUPPLEMENTAL MATERIAL

**Figure 1. Transfection of BLM melanoma cells with siRNA for CXCR4 and MT1-MMP.** BLM cells were transfected with control, CXCR4 or MT1-MMP siRNA and expression of CXCR4 was subsequently analyzed by RT-PCR (A), whereas MT1-MMP expression was monitored by confocal microscopy, using anti-MT1-MMP mAb. In confocal images, MT1-MMP and actin expression is shown in equivalent cell sections corresponding to representative fields. DIC images confirmed the presence of cells (not shown).

**Figure 2. Cell cycle analyses of BLM cells treated with AG490, wortmanin and LY294002.** Cells were treated for 24 h with AG490 (25  $\mu$ M), wortmanin (100 nM) or LY294002 (25  $\mu$ M) followed by cell cycle analyses by flow cytometry to test potential induction of apoptosis. As shown, none of these inhibitors significantly altered cell cycle as compared with untreated controls (Medium).

**A**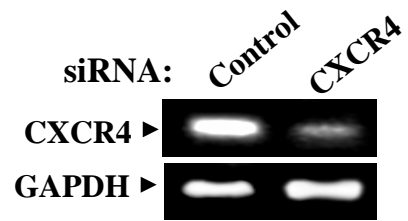**B**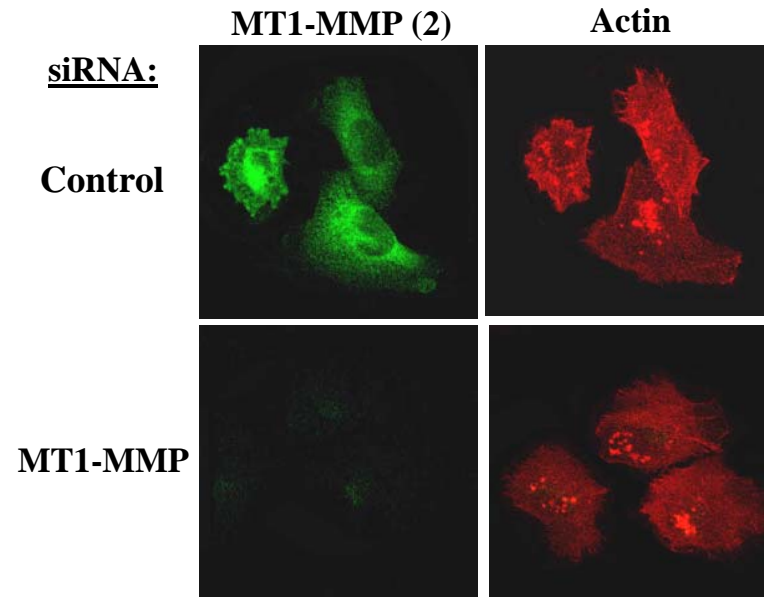

**A**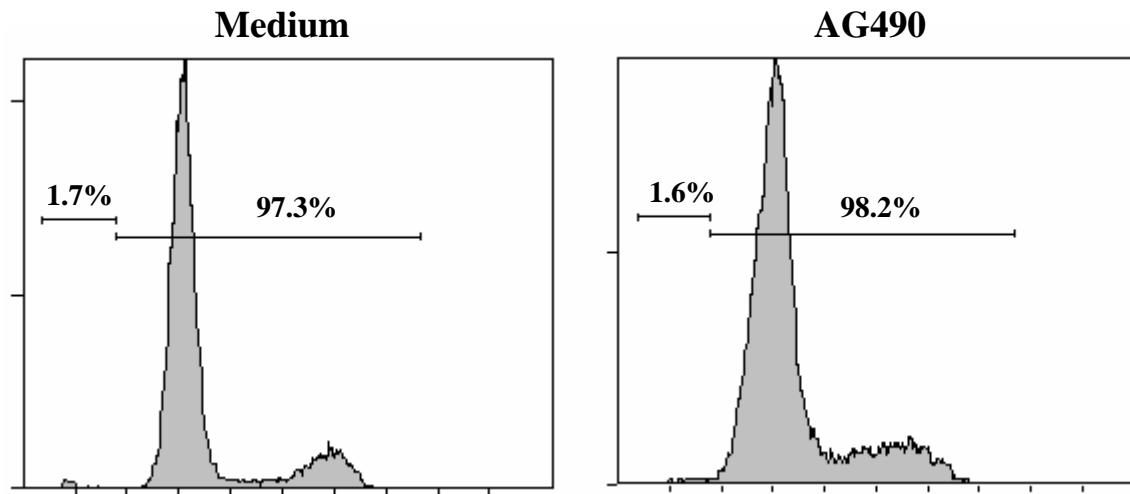**B**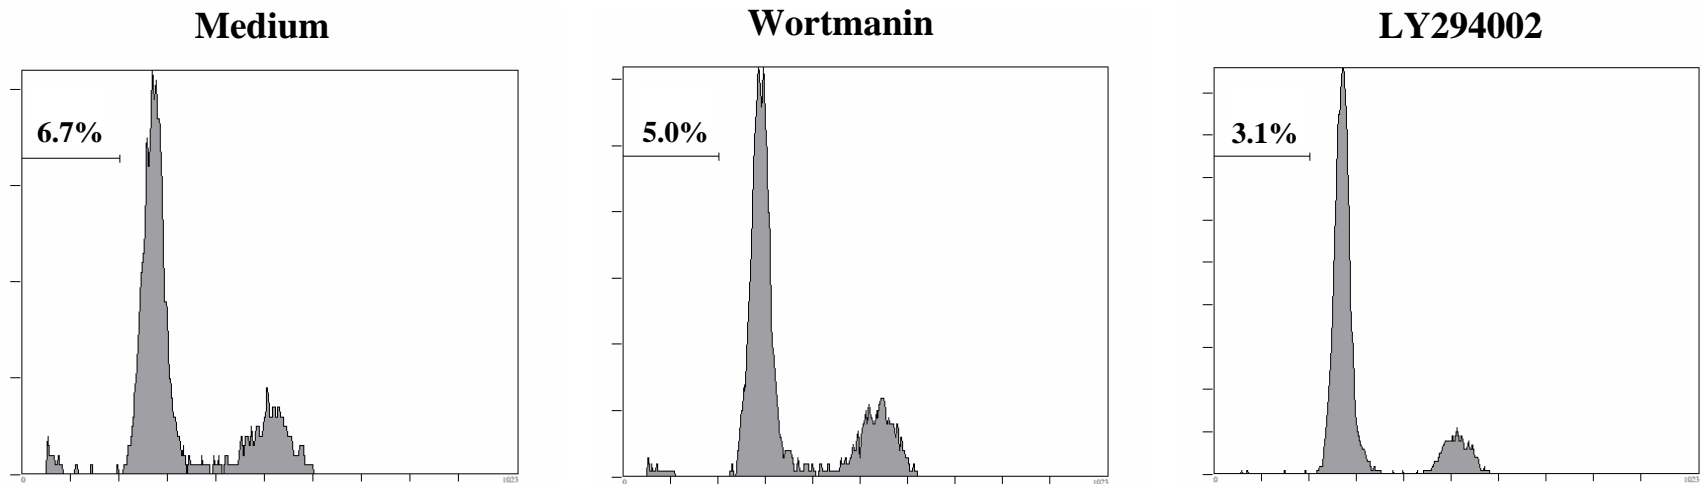**Supplementary figure 2**
